# Supplementary material
Source: PubMed Central journal article supplement (PMC5729332)

## Supplementary Figure S2

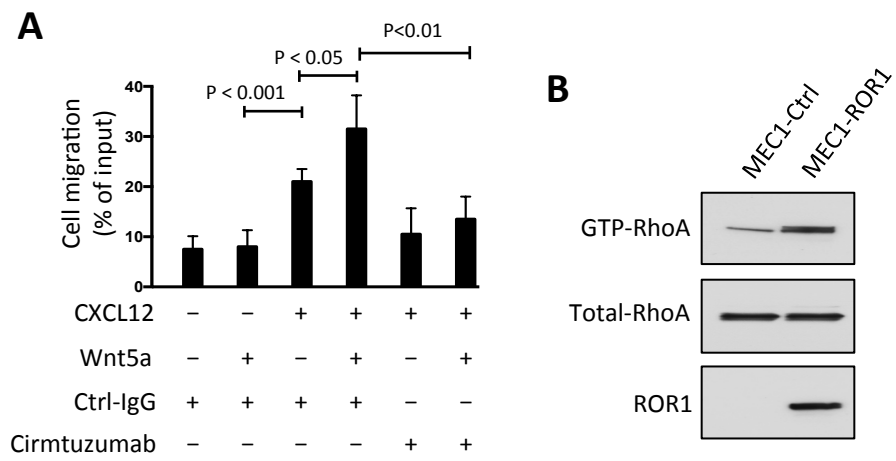

## Supplementary Figure S3

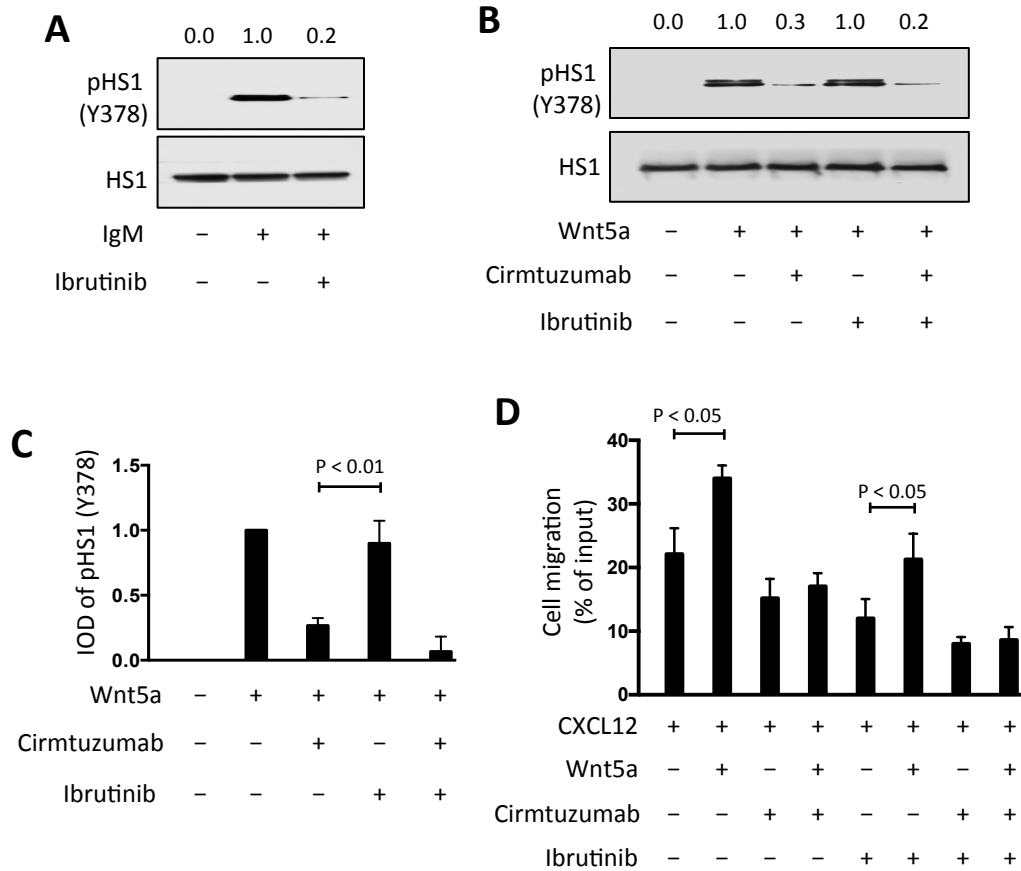

## Supplementary Figure S4

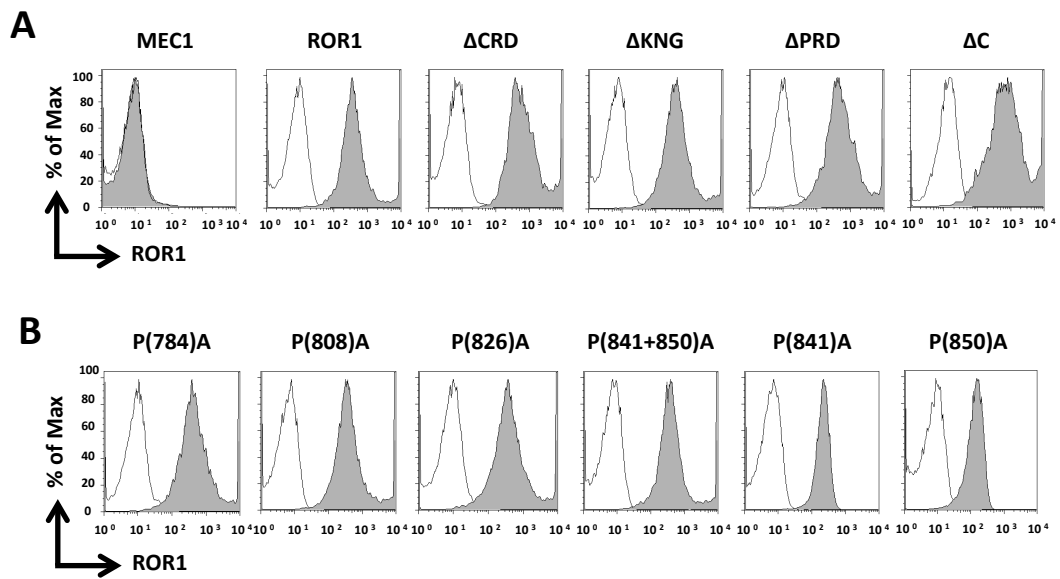



## Supplementary Figure S5

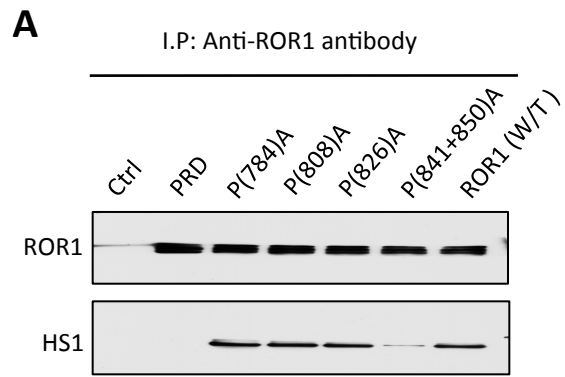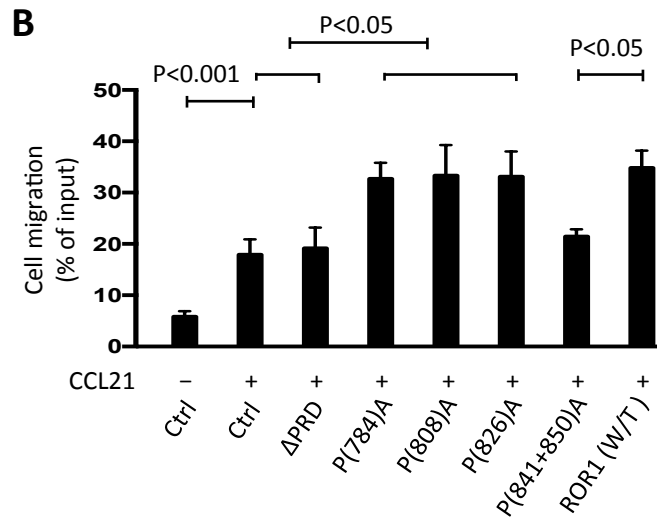

## Supplementary Figure S6

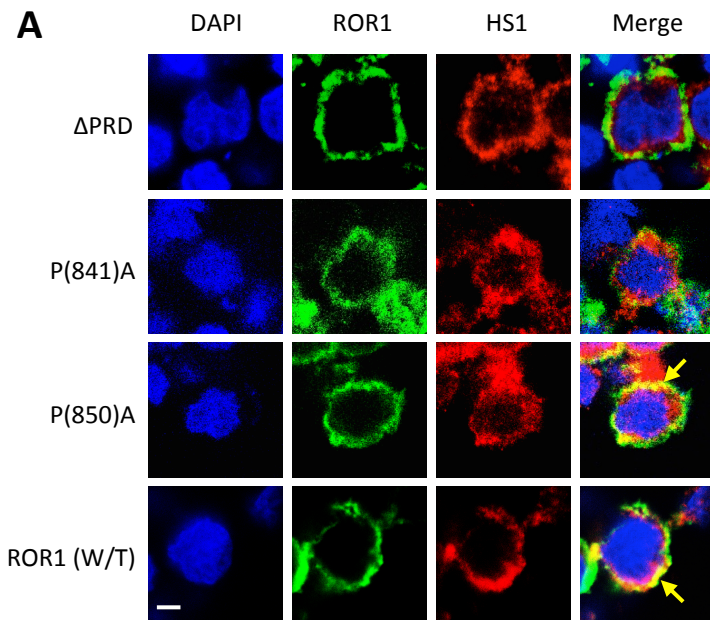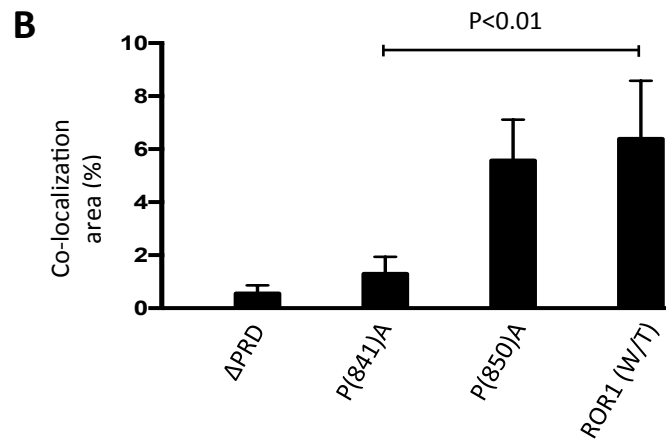

Supplement: leu2017133x2.pdf [file leu2017133x2.pdf]
